# Supplementary material
Source: PubMed Central journal article supplement (PMC6054348)
Supplement: ASN.2017080826SupplementaryData2.pdf [file ASN.2017080826SupplementaryData2.pdf]

## **SIGNIFICANCE STATEMENT**

*Nedd4-2* associates with the epithelial Na<sup>+</sup> channel (ENaC), resulting in its ubiquitylation and then, internalization and degradation. In the absence of *Nedd4-2*, increased renal Na<sup>+</sup> absorption and increased BP are observed. Despite high levels of *Nedd4-2* expression in intercalated cells, the role that these cells play in the changes in BP observed with *Nedd4-2* gene ablation is unknown. This study is the first to show that *Nedd4-2*-dependent changes in BP occur in part from *Nedd4-2* expressed in intercalated cells. Moreover, this study shows that *Nedd4-2* gene ablation within intercalated cells stimulates electroneutral apical Cl<sup>-</sup>/HCO<sub>3</sub><sup>-</sup> exchange in mouse CCD, in part by upregulating pendrin.
